# Supplementary material for: Benzotriazole-based conjugated microporous polymers as efficient flame retardants with better thermal insulation properties
Source: Royal Society of Chemistry journal article supplement (doi:10.1039/c7ta11283a), 2018-01-01
Supplement: c7ta11283a1.pdf [file c7ta11283a1.pdf]

## Electronic Supplementary Information

for *J. Mater. Chem. A*

**Title** Benzotriazole-based conjugated microporous polymers as efficient flame retardants with better thermal insulation property

Huijuan Wei<sup>a</sup>, Fei Wang<sup>a</sup>, Hanxue Sun<sup>a</sup>, Zhaoqi Zhu<sup>a</sup>, Chaohu Xiao<sup>b</sup>, Weidong Liang<sup>b</sup>, Baoping Yang<sup>a</sup>, Lihua Chen<sup>b\*</sup>, An Li<sup>a\*</sup>

**Table S1** Porous properties of ZCMP-1 and ZCMP-2.

| Samples | S <sub>BET</sub><br>[m <sup>2</sup> g <sup>-1</sup> ] | S <sub>micro</sub><br>[m <sup>2</sup> g <sup>-1</sup> ] | V <sub>micro</sub><br>[cm <sup>3</sup> g <sup>-1</sup> ] | V <sub>total</sub><br>[cm <sup>3</sup> g <sup>-1</sup> ] | D <sub>BJH</sub><br>[nm] |
|---------|-------------------------------------------------------|---------------------------------------------------------|----------------------------------------------------------|----------------------------------------------------------|--------------------------|
| ZCMP-1  | 691                                                   | 276                                                     | 0.149                                                    | 0.416                                                    | 2.4                      |
| ZCMP-2  | 483                                                   | 306                                                     | 0.163                                                    | 0.298                                                    | 2.5                      |

**Table S2** MCC data of ZCMP-1 and ZCMP-2.

| Samples | T <sub>max</sub><br>[°C] | pHRR<br>[W g <sup>-1</sup> ] | THR<br>[KJ g <sup>-1</sup> ] | Residual mass<br>[%] |
|---------|--------------------------|------------------------------|------------------------------|----------------------|
| ZCMP-1  | 354.1                    | 11.9                         | 6.7                          | 74.3                 |
| ZCMP-2  | 382.7                    | 9.9                          | 5.9                          | 83.7                 |

**Table S3** Cone calorimetric data of pure EP and ZCMPs/EP (heat flux of 35 kW m<sup>-2</sup>).

| Sample    | T <sub>pHRR</sub><br>(s) | pHRR<br>(W g <sup>-1</sup> ) | THR<br>(KJ g <sup>-1</sup> ) | Residual mass<br>(%) |
|-----------|--------------------------|------------------------------|------------------------------|----------------------|
| Pure EP   | 310                      | 559.0                        | 91.9                         | 41.1                 |
| ZCMP-1/EP | 225                      | 490.1                        | 74.4                         | 24.1                 |
| ZCMP-2/EP | 220                      | 461.6                        | 59.8                         | 42.1                 |
